# Supplementary material
Source: publisher figshare collection journal article supplement (https://gsapubs.figshare.com/ndownloader/files/23298704)
Supplement: Supplementary file 1 [file 23298704]

2 Shaking water out of soils

3

4 SUPPLEMENTARY INFORMATION

5

6 **Christian H. Mohr<sup>1,2</sup>, Michael Manga<sup>2</sup>, Chi-yuen Wang<sup>2</sup>, James W. Kirchner<sup>2,3</sup> and Axel**  
7 **Bronstert<sup>1</sup>**

8

9 *<sup>1</sup>Institute of Earth- and Environmental Science, University of Potsdam, Potsdam 14476,*  
10 *Germany*

11 *<sup>2</sup>Department of Earth and Planetary Science, University of California, Berkeley, California*  
12 *94720, USA*

13 *<sup>3</sup>Department of Environmental Sciences, Swiss Federal Institute of Technology, ETH, Zürich*  
14 *8092, Switzerland*

15

16 Corresponding author

17 Christian Mohr

18 Institute of Earth and Environmental Science

19 Geohazards Research Group

20 Karl-Liebknecht-Strasse 24-25

21 14476 Potsdam-Golm/ Germany

22 cmohr@uni-potsdam.de

23 Tel.: +49-331-977-2254

24 Fax.: +49-331-977-2068

25 **METHODS**

26 **Observation of streamflow, rainfall and soil moisture.**

27 Streamflow discharge was monitored by a flume equipped with a custom-built water stage  
28 recorder with a resolution of 2 mm. The sampling interval was 10 minutes. Rainfall was  
29 recorded by a Hobo tipping bucket rain gauge close to the streamflow gauging station and at a  
30 meteorological station about 600 m north of the catchment. The rain gauge registers data with  
31 an accuracy of 0.2 mm. Soil moisture was manually estimated using a mobile TDR-Trime-  
32 Probe (IMKO) along transects of access tubes in 10 cm depth increments up to a maximum  
33 depth of 270 cm below surface. Access tubes were installed only in various adjacent  
34 catchments. There, the number of access tubes ranged between 6 and 15. The last soil  
35 moisture measurements before the earthquake were carried out on February 19<sup>th</sup> 2010.

36

37 **Rescaling of evapotranspiration rates and normalization of discharge**

38 Evapotranspiration rates were rescaled using potential evapotranspiration  $ET_{pot}$  estimated by  
39 Penman-Monteith and a scale factor  $s$ :

40  $ET_{rescaled}(mm/h) = ET_{pot} * s$  with  $s = \frac{[average(P) - average(Q)]}{average[ET_{pot}]}$  (eq. 1 and 2)

41 Amplitudes of daily cycling of streamflow discharge were normalized to daily average  
42 discharge according to:

43  $Amplitude = \frac{[\max(Q) - \min(Q)]}{average[Q]}$  (eq. 3)

44

45 **Modelling**

46

47 ***Modelling of Groundwater flow***

48 The equations for groundwater flow are solved numerically with an implicit finite difference  
49 method. Although they are geometrically simplified, 1-D models are commonly used to  
50 interpret hydrological responses to earthquakes (Wang, 2004; Manga, 2001; Wang, 2010).

51

52 ***Modelling of co-seismic water mobilization from the vadose zone***

53 Co-seismic recharge  $A(t)$ , the excess water released per unit volume averaged across the  
54 catchment area, is modelled following Wang et al. (2004) by using a steep co-seismic  
55 arctangent saltus function

56 
$$A = \left[ \frac{\pi}{2} + \arctan c(t - t_0) \right] \quad (\text{eq. 7})$$

57 where the parameter  $c$  is fitted to the steepness of the increase of streamflow discharge and  $t_0$   
58 is the time of the earthquake.

59 In contrast to previous studies, we infer that the excess water mobilized by the  
60 earthquake comes at least partially from the vadose zone. Saturated flow is governed by  
61 Darcy's law (Hillel, 2003) and initiated when the negative pressure head (suction) that is  
62 expressed by matric potential  $\Psi_{matric}$  (adhesive intermolecular forces between water and soil  
63 solids and cohesive forces between the water molecules; Hillel, 2003) is exceeded by the  
64 seismic accelerations. Hence, an additional positive force is needed to release the capillary  
65 soil water from the pores. Seismic energy density  $e$  is defined as the maximum seismic energy  
66 available in a unit volume to do work on rock or sediment (Wang, 2010) and may be  
67 estimated by

68 
$$\log_{10} e \left( J/m^3 \right) = -3.03 \log_{10} r + 1.45M - 4.24 \quad (\text{eq. 8})$$

69 with earthquake Magnitude  $M$  and the epicentral distance  $r$  in kilometres. The seismic energy  
70 density in equation (8) is expressed in  $\text{J/m}^3$  and can be treated as a pressure head (Pa)  
71 counteracting the matric potential.

72 Given this key assumption and the parameter values of  $M=8.8$  and  $r=115\text{-}130\text{km}$ ,  $e$   
73 yields  $10^2\text{-}10^3$  Pa acting as a positive pressure head ( $\Psi_{seismic}$ ) and the static threshold of  
74 saturation  $\theta$  dynamically evolves during shaking according to

$$75 \quad \theta^{(\Psi_{seismic} + \Psi_{matric})} = \left[ 1 + [\alpha * (\Psi_{seismic} + \Psi_{matric})]^n \right]^{-1 + \frac{1}{n}} \quad (\text{eq. 9})$$

76 where  $\alpha$  and  $n$  represent the Van Genuchten empirical texture-specific parameters (Van  
77 Genuchten, 1980).

78 As a result, flow conditions dynamically switch from an unsaturated to saturated state  
79 once the seismic energy density exceeds the matric potential ( $\Psi_{seismic} \geq \Psi_{matric}$ ). In fact, this  
80 estimate is a lower bound since flow already initiates under unsaturated flow conditions by  
81 gravity and, thus, vertical drainage from the vadose zone is already expected when  $\Psi_{matric} \leq$   
82  $\Psi_{seismic} + \Psi_{gravitational}$ . Given the possibility to drain, the mobilized soil moisture recharges the  
83 aquifer during the shaking. Although the relation between the seismic energy density,  
84 earthquake magnitude and epicentral distance was derived for Southern California (Wang,  
85 2007), we use it here as a first approximation, in the absence of a similar relation for Chile.  
86 The absence of a hydrological response to the Araucaria aftershock is consistent because its  
87 seismic energy density is much smaller – too small to release water from the vadose zone.

88

### 89 ***Inverse modelling of evapotranspiration***

90 We estimated evapotranspiration by three different methods: (1) simple spline interpolation  
91 linking maximum daily discharge, (2) considering maximum recharge rates during night  
92 (White, 1932) and (3) by ‘doing hydrology backwards’ as proposed by Kirchner (2009).

93 Daily evapotranspiration was estimated as the difference between a spline interpolation  
 94 linking daily maximum discharge rates – as expected without evapotranspiration losses during  
 95 night – and the observed discharge rates including the evapotranspiration signal. In addition  
 96 daily evapotranspiration rates were independently estimated by the method of White (1932)  
 97 considering maximum recharge rates during night:

$$98 \quad E_t = S_y (24r \pm sd) \quad (\text{eq. 10})$$

99 where  $S_y$  refers to a specific yield and  $r$  to the slope of the tangential line drawn to the  
 100 increasing streamflow discharge (mm/h) during predawn/dawn times when  $E_t$  is negligible.  
 101 Uncertainty is given by  $\pm$  one standard deviation ( $sd$ ). Assuming the streamflow increase is  
 102 proportional to the rate of groundwater recharge to the riparian zone, we then extend the  
 103 tangential line over a 24h period and take the difference to the streamflow discharge rates to  
 104 estimate the total water recharge to the riparian buffer zone (Gribovszki, 2010). The estimated  
 105 recharge rate must be modified by the difference in the observed streamflow discharge rates  
 106 over the 24h-period because streamflow discharge only rarely reaches the rates of the  
 107 previous day.

108 Finally, we calculated evapotranspiration rates  $E_t$  (t) following Kirchner’s approach of  
 109 “doing hydrology backwards”, a modelling procedure based on observable fluxes assuming a  
 110 catchment-specific relationship between discharge and storage rather than on point-scale  
 111 measured soil-hydrologic properties (Kirchner, 2009). Here, evapotranspiration rates are a  
 112 function of time and can be approximated using the conservation-of-mass equation when  
 113 storage  $S$  (units of depth), precipitation  $P$  and discharge  $Q$  (both in units of depth per time) are  
 114 known,

$$115 \quad E_t = P - Q - \frac{\partial S}{\partial t} \quad (\text{eq. 11})$$

116 Assuming that discharge depends only on water storage across the catchment, the invertible  
 117 relation between water storage and discharge can be written as

118  $Q = f(S) \quad \leftrightarrow \quad S = f^{-1}(Q)$

119 Hence,  $Q$  can be expressed by using a catchment-specific function of water storage, which  
 120 relates changes in discharge  $Q$  to changes in catchment specific storage  $S$

121 
$$\frac{\partial Q}{\partial t} = \frac{\partial Q}{\partial S} * \frac{\partial S}{\partial t} = \frac{\partial Q}{\partial S} (P - E_t - Q)$$
 (eq. 12)

122 The term  $\frac{\partial Q}{\partial S}$  is the derivative of the storage-discharge relationship  $f(S)$  and expresses the  
 123 sensitivity of discharge to changes in storage. Owing to the assumption that  $S$  is a function of

124  $Q$ ,  $\frac{\partial Q}{\partial S}$  can be considered as the discharge sensitivity function  $g(Q)$

125 
$$\frac{\partial Q}{\partial S} = f'(S) = f'(f^{-1}(Q)) = g(Q)$$
 (eq. 13)

126 The discharge sensitivity function can then be approximated from observed fluxes

127 
$$g(Q) = \frac{\partial Q}{\partial S} = \frac{\partial Q / \partial t}{\partial S / \partial t} = \frac{\partial Q / \partial t}{P - E - Q}$$
 (eq. 14)

128 Once this catchment specific discharge sensitivity function  $g(Q)$  is identified, changes in  
 129 storage can be inferred and thus losses or gains from discharge  $Q$ , precipitation  $P$  or  
 130 evapotranspiration  $E_t$  can be estimated from the discharge time series (Kirchner, 2009). In  
 131 practice,  $g(Q)$  is estimated as an empirical function from plotting the recession rate  $(-\partial Q / \partial t)$   
 132 as a function of discharge  $Q$ . We approximated this function using a power law function of  $Q$

133 
$$g(Q) = \frac{\partial Q}{\partial S} = \frac{\partial Q / \partial t}{-Q} = a * Q^{b-1}$$
 (eq. 15)

134 with slope  $b$  and intercept  $a$  in which  $a$  reflects scaling, physical and/or geomorphic properties  
 135 of the catchment (Rupp, 2006).

136 As no rainfall was recorded around the time of the earthquake ( $P \approx 0$ ),

137 evapotranspiration rates  $E_t$  are inferred by

138 
$$E_t|_{P=0} = -\frac{\partial Q / \partial t}{g(Q)} - Q \approx -\frac{(Q_{t+1} - Q_{t-1}) / 2 \partial t}{[g(Q_{t+1}) + g(Q_{t-1})] / 2} - (Q_{t+1} + Q_{t-1}) / 2 \quad (\text{eq. 16})$$

139 for the time steps  $t$  (Kirchner, 2009).

140 In order to minimize the impact of evapotranspiration and rainfall fluxes on  $g(Q)$ , only  
 141 discharge recession data during night within a period of no recorded rainfall 6h prior and at  
 142 least 2hr after were considered to determine  $g(Q)$  (Kirchner, 2009). Owing to the lag effects  
 143 of evapotranspiration on night-time streamflow during the dry season, the selection criteria  
 144 were further expanded to rainless periods during the rainy season with relatively low  
 145 evapotranspiration rates. In order to estimate the impact of  $g(Q)$  on evapotranspiration, a  
 146 sensitivity analysis for  $a$  and  $b$  was conducted in the range of  $\pm$  one standard error. The  $g(Q)$   
 147 function was also applied in a simplified way in order to increase sensitivity of  $E_t$  to  
 148  $-\frac{\partial Q / \partial t}{g(Q)}$ . Because  $Q$  is two orders of magnitude smaller than potential evapotranspiration

149 and there was no rainfall, we assume  $Q$  and  $P$  are negligible which thus simplifies  $E_t$  to

150 
$$E_t|_{P=0, Q \ll E_t} = -\frac{\partial Q / \partial t}{g(Q)} \approx -\frac{(Q_{t+1} - Q_{t-1}) / 2}{[g(Q_{t+1}) + g(Q_{t-1})] / 2} \quad (\text{eq.17})$$

151 Possible earthquake effects on porosity were explored by comparing pre- and post-  
 152 seismic discharge sensitivity functions  $g(Q)$ , since storage  $S$  is directly related to porosity  
 153 (Freeze, 1979).

154 Daily evapotranspiration values for the periods from February 20<sup>th</sup> – 26<sup>th</sup> and February 28<sup>th</sup> –  
 155 March 11<sup>th</sup> were compared and statistically tested by the Wilcoxon rank sum test at a  
 156 significance level of alpha=5%. The relationship between changes in streamflow discharge  
 157 amplitudes and changes in daily evapotranspiration before and after the earthquake was  
 158 assessed by applying analysis of covariance at the same significance level.

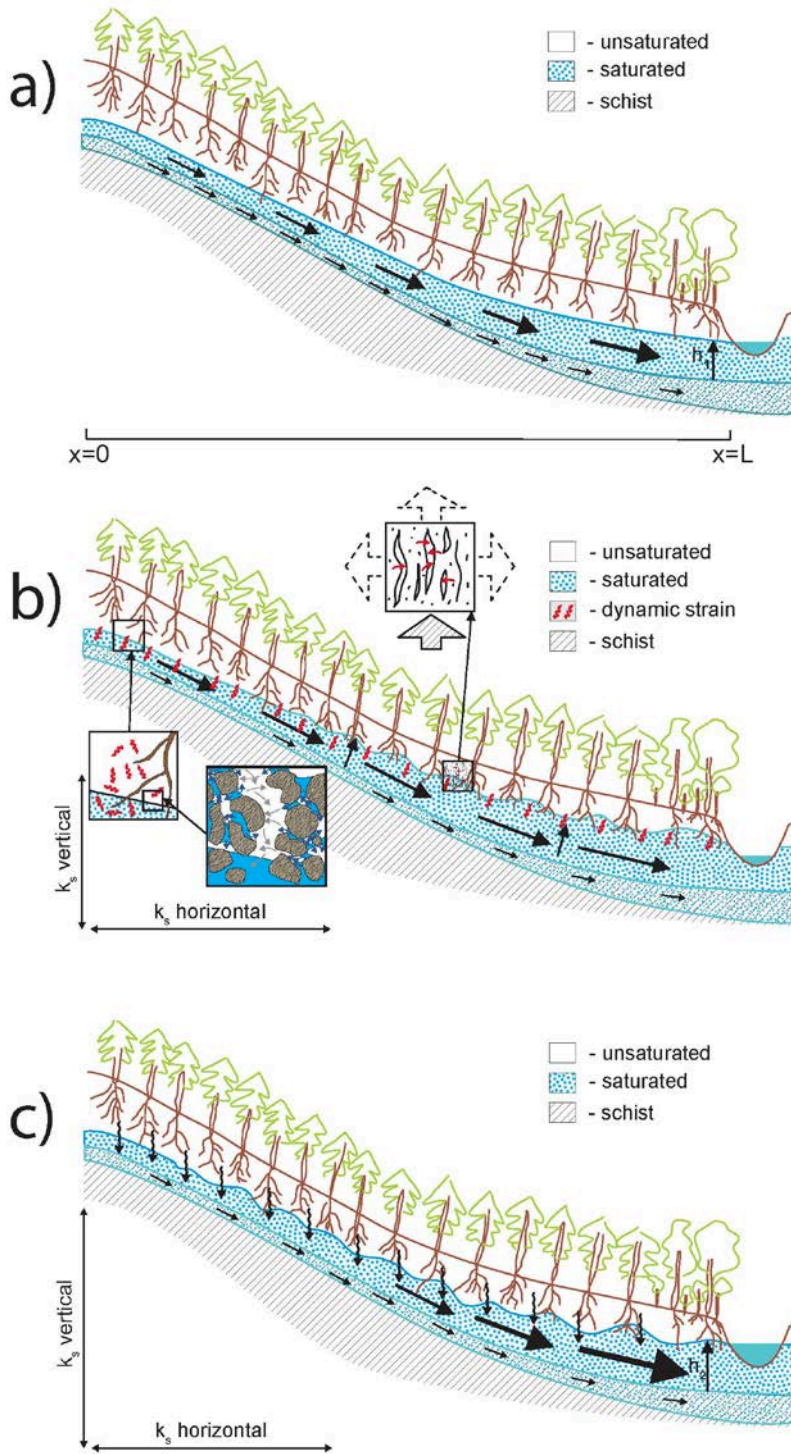



165 availability is limited to deep rooting riparian vegetation. Thus, plant activity is relatively low.  
166 Thickness of black arrows indicates relative volume of subsurface flow and dots indicate the  
167 saturation level of each geological unit. (b) During the earthquake: Ground shaking causes  
168 two effects. First, it dilates the shallowest sediments and forms cracks. Water then migrates  
169 from saturated pores into the new cracks (red arrows) lowering the hydraulic head until the  
170 dilatant cracks are filled. As a result, streamflow is temporarily disrupted. Further, dilatant  
171 cracking enhance vertical permeability and thus improves connectivity between vadose zone  
172 water and the groundwater flow zone. Second, ground shaking mobilizes vadose zone water  
173 when  $\Psi_{matric} \leq \Psi_{seismic} + \Psi_{gravitational}$ . (grey arrows in inset). Upon established connectivity  
174 between vadose zone and groundwater zone, the released water recharges the groundwater.  
175 Drainage is provided by preferential flow paths, e.g. root channels or soil cracks, clearing of  
176 clogged macro-pores by transient stresses from seismic waves and dilatant cracks. Horizontal  
177 permeability remains unchanged. (c) After the earthquake: As the released vadose zone water  
178 recharges the groundwater, the groundwater table rises ( $h_2$ ) and extends the ‘active zone’ of  
179 high root-water-uptake along the valley bottoms. There, the available water resources promote  
180 plant activity along the riparian buffer strips as reflected in intensified diurnal streamflow  
181 oscillation. Further, the higher groundwater table increases streamflow discharge.  
182

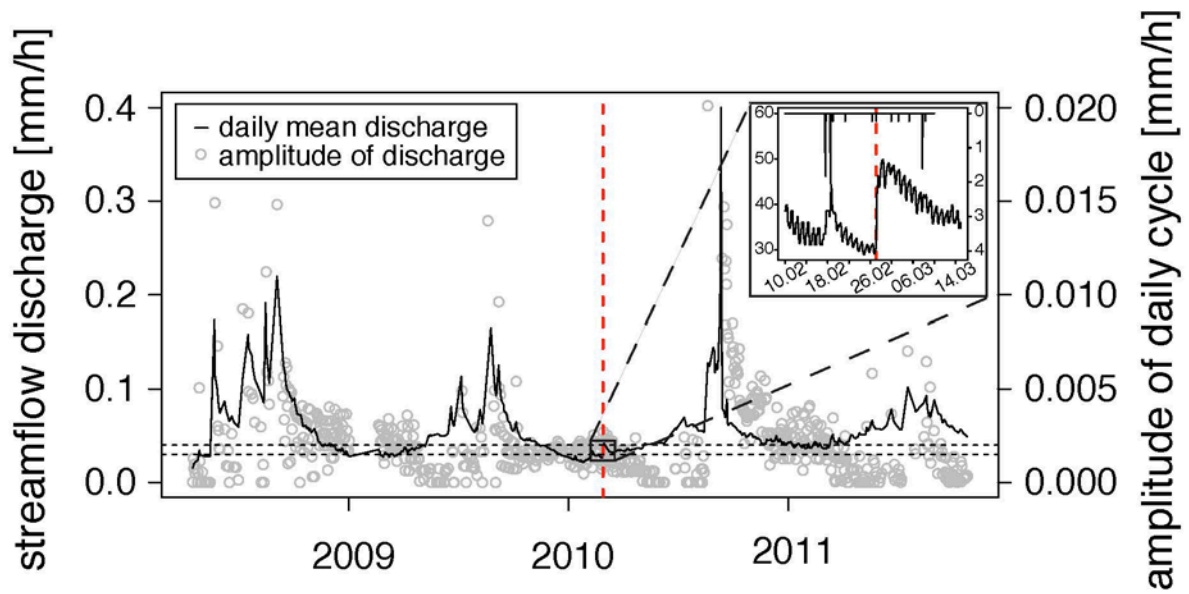

183

184 Supplement Figure 2. Daily mean streamflow discharge (mm/h) and amplitudes of diurnal  
 185 streamflow cycling (mm/h) for the period from April 17th 2008 to October 25th 2011. The  
 186 red dashed line shows the time of the earthquake. The black dashed horizontal lines indicate  
 187 the range of streamflow discharge that was observed during the first days after the earthquake.

188

189

190

191

192

193

194

195

196

197

198

199

200

201 **SUPPLEMENTARY TABLE**

202 Supplementary Table 1. Estimated whole-catchment daily evapotranspiration (mm/day) by  
 203 doing hydrology backwards, applying the approach by White and by spline interpolation.

| Date       | Hydrology<br>backwards | White<br>(1932) | Spline<br>Interpolation |
|------------|------------------------|-----------------|-------------------------|
| 20.02.2010 |                        |                 | 0.033                   |
| 21.02.2010 | 0.076                  | 0.034           | 0.036                   |
| 22.02.2010 | 0.073                  | 0.033           | 0.030                   |
| 23.02.2010 | 0.071                  | 0.033           | 0.028                   |
| 24.02.2010 | 0.069                  | 0.033           | 0.030                   |
| 25.02.2010 | 0.069                  | 0.034           | 0.017                   |
| 26.02.2010 | 0.069                  | 0.033           | 0.030                   |
| 27.02.2010 | -                      | -               |                         |
| 28.02.2010 | 0.108                  | -               | 0.047                   |
| 01.03.2010 | 0.109                  | 0.048           | 0.028                   |
| 02.03.2010 | 0.107                  | 0.046           | 0.033                   |
| 03.03.2010 | 0.104                  | 0.047           | 0.042                   |
| 04.03.2010 | 0.101                  | 0.048           | 0.045                   |
| 05.03.2010 | 0.099                  | 0.049           | 0.042                   |
| 06.03.2010 | 0.094                  | 0.050           | 0.047                   |
| 07.03.2010 | 0.094                  |                 | 0.033                   |
| 08.03.2010 | 0.092                  |                 | 0.031                   |
| 09.03.2010 | 0.088                  |                 | 0.043                   |
| 10.03.2010 | 0.086                  |                 | 0.040                   |

204
